# Supplementary material for: Are suggestions from coupled file changes useful for perfective maintenance tasks?
Source: PeerJ journal article supplement (doi:10.7717/peerj-cs.135), 2017-10-16
Supplement: COUPLED_CHANGES_EXPERIMENT_QUESTIONNAIRE_a.pdf [file COUPLED_CHANGES_EXPERIMENT_QUESTIONNAIRE_a.pdf]

## **COUPLED CHANGES EXPERIMENT QUESTIONNAIRE WITH SUGGESTIONS**

**1. What is your programming experience in Java?**

- a) Less than 6 months
- b) 6 months to 1 year
- c) 1-2 years
- d) 2-3 years
- e) 3-5 years
- f) More than 5 years

**2. What is your experience in using versioning systems (SVN, Git, Mercurial or other)**

- a) Less than 6 months
- b) 6 months to 1 year
- c) 1-2 years
- d) 2-3 years
- e) 3-5 years
- f) More than 5 years

**3. What is your experience in using issue tracking systems (JIRA, Redmine, Bugzilla or other)**

- a) Less than 6 months
- b) 6 months to 1 year
- c) 1-2 years
- d) 2-3 years
- e) 3-5 years
- f) More than 5 years

**4. Have you being in any way involved on the ASTPA project?**

- a) Yes
- b) No
